# Supplementary material for: Airway inflammation in cystic fibrosis: molecular mechanisms and clinical implications
Source: HighWire-hosted journal article supplement (doi:10.1136/thoraxjnl-2013-203204), 2013-05-23
Supplement: thoraxjnl-2013-203204supp.pdf [file thoraxjnl-2013-203204supp.pdf]

## Supplemental file

**Table S1** – The pro-inflammatory profile of airway epithelial and immune cells in the cystic fibrosis lung

---

| <b>Cell source</b>             | <b>Pro-inflammatory phenotype</b>                                                                                          |
|--------------------------------|----------------------------------------------------------------------------------------------------------------------------|
| <b>Airway epithelial cells</b> | Dysregulation of transcription factor activation <sup>15, S25, S27</sup>                                                   |
|                                | ER stress response to abnormally folded CFTR <sup>18, S30</sup>                                                            |
|                                | Higher and more protracted IL-8 production in response to infection, and higher concentration gradient <sup>S11, S12</sup> |
|                                | Decreased apoptosis during viral infection <sup>10</sup>                                                                   |
|                                | Increased viral replication <sup>10</sup>                                                                                  |
| <b>Immune cells</b>            | Abnormal immune cell localization in the lung <sup>22, S31, S33, S34</sup>                                                 |
|                                | Increased production of CC chemokines and IL-2 <sup>20</sup>                                                               |
|                                | Lower production of IL-10, IL-8, IFN- $\gamma$ <sup>21</sup>                                                               |
|                                | Increased expression of TLR-4 <sup>21, S32</sup>                                                                           |
|                                | Defective killing of internalized bacteria <sup>S34</sup>                                                                  |
|                                | Increased Th17 cells and IL-17 production <sup>23, S35</sup>                                                               |

---

## Online references (Supplemental file)

1-44

- [1] Gangell C, Gard S, Douglas T, et al. Inflammatory responses to individual microorganisms in the lungs of children with cystic fibrosis. *Clin Infect Dis*. 2011 Sep;53(5):425-32.*Clin Infect Dis*
- [2] Verhaeghe C, Delbecque K, de Leval L, et al. Early inflammation in the airways of a cystic fibrosis foetus. *J Cyst Fibros*. 2007 Jul;6(4):304-8.*J Cyst Fibros*
- [3] Khan TZ, Wagener JS, Bost T, et al. Early pulmonary inflammation in infants with cystic fibrosis. *Am J Respir Crit Care Med*. 1995 Apr;151(4):1075-82.*Am J Respir Crit Care Med*
- [4] Sly PD, Brennan S, Gangell C, et al. Lung disease at diagnosis in infants with cystic fibrosis detected by newborn screening. *Am J Respir Crit Care Med*. 2009 Jul 15;180(2):146-52.*Am J Respir Crit Care Med*
- [5] Armstrong DS, Hook SM, Jansen KM, et al. Lower airway inflammation in infants with cystic fibrosis detected by newborn screening. *Pediatric pulmonology*. 2005 Dec;40(6):500-10.*Pediatric pulmonology*
- [6] Hartl D, Latzin P, Hordijk P, et al. Cleavage of CXCR1 on neutrophils disables bacterial killing in cystic fibrosis lung disease. *Nat Med*. 2007 Dec;13(12):1423-30.*Nat Med*
- [7] Gray RD, Imrie M, Boyd AC, et al. Sputum and serum calprotectin are useful biomarkers during CF exacerbation. *J Cyst Fibros*. 2012 May;9(3):193-8.*J Cyst Fibros*
- [8] Mall MA, Harkema JR, Trojanek JB, et al. Development of chronic bronchitis and emphysema in beta-epithelial Na<sup>+</sup> channel-overexpressing mice. *Am J Respir Crit Care Med*. 2008 Apr 1;177(7):730-42.*Am J Respir Crit Care Med*
- [9] Butterworth MB, Zhang L, Heidrich EM, et al. Activation of the epithelial sodium channel (ENaC) by the alkaline protease from *Pseudomonas aeruginosa*. *J Biol Chem*. 2012 Sep 21;287(39):32556-65.*J Biol Chem*
- [10] Stoltz DA, Meyerholz DK, Pezzulo AA, et al. Cystic fibrosis pigs develop lung disease and exhibit defective bacterial eradication at birth. *Sci Transl Med*. 2010 Apr 28;2(29):29ra31.*Sci Transl Med*
- [11] Farberman MM, Ibricevic A, Joseph TD, et al. Effect of polarized release of CXC-chemokines from wild-type and cystic fibrosis murine airway epithelial cells. *American journal of respiratory cell and molecular biology*. 2011 Aug;45(2):221-8.*American journal of respiratory cell and molecular biology*
- [12] Muhlebach MS, Stewart PW, Leigh MW, et al. Quantitation of inflammatory responses to bacteria in young cystic fibrosis and control patients. *Am J Respir Crit Care Med*. 1999 Jul;160(1):186-91.*Am J Respir Crit Care Med*
- [13] Bonfield TL, Konstan MW, Berger M. Altered respiratory epithelial cell cytokine production in cystic fibrosis. *J Allergy Clin Immunol*. 1999 Jul;104(1):72-8.*J Allergy Clin Immunol*
- [14] Tunney MM, Klem ER, Fodor AA, et al. Use of culture and molecular analysis to determine the effect of antibiotic treatment on microbial community

- diversity and abundance during exacerbation in patients with cystic fibrosis. *Thorax*. 2011 Jul;66(7):579-84.*Thorax*
- [15] Wat D, Gelder C, Hibbitts S, et al. The role of respiratory viruses in cystic fibrosis. *J Cyst Fibros*. 2008 Jul;7(4):320-8.*J Cyst Fibros*
- [16] Palm K, Sawicki G, Rosen R. The impact of reflux burden on *Pseudomonas* positivity in children with cystic fibrosis. *Pediatric pulmonology*. 2012 Jun;47(6):582-7.*Pediatric pulmonology*
- [17] Allard JB, Poynter ME, Marr KA, et al. *Aspergillus fumigatus* generates an enhanced Th2-biased immune response in mice with defective cystic fibrosis transmembrane conductance regulator. *J Immunol*. 2006 Oct 15;177(8):5186-94.*J Immunol*
- [18] Stevens DA, Moss RB, Kurup VP, et al. Allergic bronchopulmonary aspergillosis in cystic fibrosis--state of the art: Cystic Fibrosis Foundation Consensus Conference. *Clin Infect Dis*. 2003 Oct 1;37 Suppl 3:S225-64.*Clin Infect Dis*
- [19] Baxter CG, Moore CB, Jones AM, et al. IgE mediated immune responses and airway detection of *Aspergillus* and *Candida* in adult cystic fibrosis. *Chest*. 2012 Nov 8.*Chest*
- [20] Pauwels A, Decraene A, Blondeau K, et al. Bile acids in sputum and increased airway inflammation in patients with cystic fibrosis. *Chest*. 2012 Jun;141(6):1568-74.*Chest*
- [21] Mitsushima H, Oishi K, Nagao T, et al. Acid aspiration induces bacterial pneumonia by enhanced bacterial adherence in mice. *Microb Pathog*. 2002 Nov;33(5):203-10.*Microb Pathog*
- [22] Kettle AJ, Chan T, Osberg I, et al. Myeloperoxidase and protein oxidation in the airways of young children with cystic fibrosis. *Am J Respir Crit Care Med*. 2004 Dec 15;170(12):1317-23.*Am J Respir Crit Care Med*
- [23] Starosta V, Griese M. Protein oxidation by chronic pulmonary diseases in children. *Pediatric pulmonology*. 2006 Jan;41(1):67-73.*Pediatric pulmonology*
- [24] Roum JH, Buhl R, McElvaney NG, et al. Systemic deficiency of glutathione in cystic fibrosis. *J Appl Physiol*. 1993 Dec;75(6):2419-24.*J Appl Physiol*
- [25] Saadane A, Masters S, DiDonato J, et al. Parthenolide inhibits I $\kappa$ B kinase, NF- $\kappa$ B activation, and inflammatory response in cystic fibrosis cells and mice. *American journal of respiratory cell and molecular biology*. 2007 Jun;36(6):728-36.*American journal of respiratory cell and molecular biology*
- [26] Kelly C, Williams MT, Mitchell K, et al. Expression of the NF- $\kappa$ B inhibitor A20 is altered in the Cystic fibrosis epithelium. *Eur Respir J*. 2012 Sep 27.*Eur Respir J*
- [27] Perez A, Issler AC, Cotton CU, et al. CFTR inhibition mimics the cystic fibrosis inflammatory profile. *Am J Physiol Lung Cell Mol Physiol*. 2007 Feb;292(2):L383-95.*Am J Physiol Lung Cell Mol Physiol*
- [28] Wiegmann K, Schutze S, Machleidt T, et al. Functional dichotomy of neutral and acidic sphingomyelinases in tumor necrosis factor signaling. *Cell*. 1994 Sep 23;78(6):1005-15.*Cell*
- [29] Teichgraber V, Ulrich M, Endlich N, et al. Ceramide accumulation mediates inflammation, cell death and infection susceptibility in cystic fibrosis. *Nat Med*. 2008 Apr;14(4):382-91.*Nat Med*

- [30] Rab A, Bartoszewski R, Jurkuvenaite A, et al. Endoplasmic reticulum stress and the unfolded protein response regulate genomic cystic fibrosis transmembrane conductance regulator expression. *Am J Physiol Cell Physiol*. 2007 Feb;292(2):C756-66.*Am J Physiol Cell Physiol*
- [31] Hubeau C, Puchelle E, Gaillard D. Distinct pattern of immune cell population in the lung of human fetuses with cystic fibrosis. *J Allergy Clin Immunol*. 2001 Oct;108(4):524-9.*J Allergy Clin Immunol*
- [32] Sturges NC, Wikstrom ME, Winfield KR, et al. Monocytes from children with clinically stable cystic fibrosis show enhanced expression of Toll-like receptor 4. *Pediatric pulmonology*. 2010 Sep;45(9):883-9.*Pediatric pulmonology*
- [33] Hubeau C, Lorenzato M, Couetil JP, et al. Quantitative analysis of inflammatory cells infiltrating the cystic fibrosis airway mucosa. *Clin Exp Immunol*. 2001 Apr;124(1):69-76.*Clin Exp Immunol*
- [34] Tirouvanziam R, Gernez Y, Conrad CK, et al. Profound functional and signaling changes in viable inflammatory neutrophils homing to cystic fibrosis airways. *Proceedings of the National Academy of Sciences of the United States of America*. 2008 Mar 18;105(11):4335-9.*Proceedings of the National Academy of Sciences of the United States of America*
- [35] McAllister F, Henry A, Kreindler JL, et al. Role of IL-17A, IL-17F, and the IL-17 receptor in regulating growth-related oncogene-alpha and granulocyte colony-stimulating factor in bronchial epithelium: implications for airway inflammation in cystic fibrosis. *J Immunol*. 2005 Jul 1;175(1):404-12.*J Immunol*
- [36] Singer F, Kieninger E, Abbas C, et al. Practicability of nitrogen multiple-breath washout measurements in a pediatric cystic fibrosis outpatient setting. *Pediatric pulmonology*. 2012 Aug 8(DOI 10.1002/ppul.22651 Published online in Wiley Online Library).*Pediatric pulmonology*
- [37] Colombo C, Faelli N, Tirelli AS, et al. Analysis of inflammatory and immune response biomarkers in sputum and exhaled breath condensate by a multi-parametric biochip array in cystic fibrosis. *Int J Immunopathol Pharmacol*. 2011 Apr-Jun;24(2):423-32.*Int J Immunopathol Pharmacol*
- [38] Burgel PR, Martin C, Fajac I, et al. Should bronchoscopy be advocated to study airway remodelling and inflammation in adults with cystic fibrosis? *Thorax*. 2012 Feb;67(2):177; author reply *Thorax*
- [39] Guran T, Ersu R, Karadag B, et al. Association between inflammatory markers in induced sputum and clinical characteristics in children with non-cystic fibrosis bronchiectasis. *Pediatric pulmonology*. 2007 Apr;42(4):362-9.*Pediatric pulmonology*
- [40] Ratjen F, Saiman L, Mayer-Hamblett N, et al. Effect of azithromycin on systemic markers of inflammation in patients with cystic fibrosis uninfected with *Pseudomonas aeruginosa*. *Chest*. 2012 Nov;142(5):1259-66.*Chest*
- [41] Horsley AR, Davies JC, Gray RD, et al. Changes in physiological, functional and structural markers of cystic fibrosis lung disease with treatment of a pulmonary exacerbation. *Thorax*. 2013 Feb 9.*Thorax*
- [42] Chen DL, Ferkol TW, Mintun MA, et al. Quantifying pulmonary inflammation in cystic fibrosis with positron emission tomography. *Am J Respir Crit Care Med*. 2006 Jun 15;173(12):1363-9.*Am J Respir Crit Care Med*

- [43] Sun X, Sui H, Fisher JT, et al. Disease phenotype of a ferret CFTR-knockout model of cystic fibrosis. *J Clin Invest*. 2010 Sep;120(9):3149-60. *J Clin Invest*
- [44] Gu Y, Harley IT, Henderson LB, et al. Identification of IFRD1 as a modifier gene for cystic fibrosis lung disease. *Nature*. 2009 Apr 23;458(7241):1039-42. *Nature*
